# Supplementary material for: Severe COVID-19 has a distinct phenotype from bacterial sepsis: a retrospective cohort study in deceased patients
Source: PubMed Central journal article supplement — Ann Transl Med. 2021 Jul;9(13):1054. doi: 10.21037/atm-21-1291 (PMC8339852; doi:10.21037/atm-21-1291), 2021-07
Supplement: atm-09-13-1054-supplementary.pdf [file atm-09-13-1054-supplementary.pdf]

**Table S1** Primary cause of infection in bacterial sepsis patients

| Patient Number | Gender | Age (years) | Primary cause of infection    |
|----------------|--------|-------------|-------------------------------|
| 1              | Male   | 63          | Acute cholangitis             |
| 2              | Male   | 74          | Severe pneumonia              |
| 3              | Male   | 65          | Acute peritonitis             |
| 4              | Male   | 83          | Acute peritonitis             |
| 5              | Male   | 80          | Acute peritonitis             |
| 6              | Male   | 60          | Acute peritonitis             |
| 7              | Male   | 64          | Pneumonia                     |
| 8              | Female | 31          | Pneumonia                     |
| 9              | Male   | 54          | Pneumonia                     |
| 10             | Male   | 57          | Acute peritonitis             |
| 11             | Male   | 68          | Acute peritonitis             |
| 12             | Male   | 71          | Acute peritonitis             |
| 13             | Male   | 86          | Acute peritonitis             |
| 14             | Male   | 70          | Acute peritonitis             |
| 15             | Female | 88          | Acute peritonitis             |
| 16             | Male   | 88          | Acute peritonitis             |
| 17             | Female | 67          | Acute cholangitis             |
| 18             | Male   | 40          | Acute peritonitis             |
| 19             | Male   | 79          | Acute peritonitis             |
| 20             | Male   | 75          | Acute peritonitis             |
| 21             | Male   | 72          | Acute peritonitis             |
| 22             | Male   | 82          | Acute suppurative cholangitis |
| 23             | Female | 78          | Acute peritonitis             |
| 24             | Male   | 72          | Acute peritonitis             |
| 25             | Male   | 77          | Bacterial liver abscess       |
| 26             | Male   | 92          | Acute peritonitis             |

**Table S2** Normal reference range of laboratory tests

| Variable                                   | Zhongshan Hospital | Jin-Yin Tan Hospital |
|--------------------------------------------|--------------------|----------------------|
| Immunological status                       |                    |                      |
| White blood cell count ( $\times 10^9/L$ ) | 3.5-9.5            | 3.5-9.5              |
| Neutrophil count ( $\times 10^9/L$ )       | 40-75              | 1.8-6.3              |
| Lymphocyte count ( $\times 10^9/L$ )       | 1.1.-3.2           | 1.1-3.2              |
| Monocyte count ( $\times 10^9/L$ )         | 0.1-0.6            | 0.1-0.6              |
| Eosinophil count ( $\times 10^9/L$ )       | 0.02-0.52          | 0.02-0.52            |
| Basophil count ( $\times 10^9/L$ )         | 0.00-0.06          | 0.00-0.06            |
| IL-6 (pg/mL)                               | <3.4               | 0-7                  |
| PCT ( $\mu g/L$ )                          | <0.5               | <0.5                 |
| CRP (mg/mL)                                | 0-10               | 0-5                  |
| Organ function                             |                    |                      |
| Hemoglobin (g/L)                           | 130-175            | 130-175              |
| Total protein (g/L)                        | 65-85              | 65-85                |
| Albumin (g/L)                              | 35-55              | 40-55                |
| Globulin (g/L)                             | 20-40              | 20-40                |
| A/G                                        | 1.2-2.4            | 1.2-2.4              |
| Total bilirubin ( $\mu mol/L$ )            | 3.4-20.4           | 0-26                 |
| Direct bilirubin ( $\mu mol/L$ )           | 0.0-6.8            | 0-8                  |
| ALT (U/L)                                  | 9-50               | 9-50                 |
| AST (U/L)                                  | 15-40              | 14-40                |
| Creatinine ( $\mu mol/L$ )                 | 44-115             | 57-97                |
| Urea (mmol/L)                              | 2.9-8.2            | 3.1-8.0              |
| LDH (U/L)                                  | 109-245            | 120-250              |
| Myohemoglobin (ng/mL)                      | 28-72              | 0-146.9              |
| Coagulation                                |                    |                      |
| Platelet count ( $\times 10^9/L$ )         | 125-350            | 125-350              |
| APTT (second)                              | 25.0-31.3          | 21-37                |
| PT (second)                                | 10.0-13.0          | 10.5-13.5            |
| Fibrinogen (g/L)                           | 2-4                | 2-4                  |
| INR                                        | 0.50-1.20          | 0.8-1.2              |
| D-dimer (g/L)                              | 0.00-0.80          | 0-1.5                |

IL-6, interleukin-6; PCT, procalcitonin; CRP, C-reactive protein; A/G, albumin/globulin ratio; ALT, alanine aminotransferase; AST, aspartate aminotransferase; LDH, lactate dehydrogenase; APTT, activated partial thromboplastin time; PT, prothrombin time; INR, international normalization ratio; PCT, procalcitonin; IL-6, interleukin-6.

**Table S3** Supplementary clinical data

| Variable              | Sepsis N=26                        | Normal reference range | Variable            | COVID-19, N=53                    | Normal reference range |
|-----------------------|------------------------------------|------------------------|---------------------|-----------------------------------|------------------------|
| CK-MB, median (IRQ)   | 3.50 (2.30, 18.70), N=23/26        | (0-24) U/L             | CK-MB               | 21.00 (14.50, 25.50), N=53        | (0-4.87) ng/mL         |
| Pro-BNP, median (IRQ) | 1711.00 (886.70, 3471.50), N=25/26 | (0-300) pg/mL          | Pro-BNP             | 1844.00 (827.75,4043.00), N=12/53 | Null                   |
| -                     | -                                  | -                      | BNP, median(IRQ)    | 104.60 (52.80, 291.60), N=39/53   | (0-100) pg/mL          |
| cTnT, median (IRQ)    | 0.04 (0.02,0.11), N=26             | <0.03 ng/mL            | High sensitive-cTnI | 0.05 (0.01, 0.64), N=49/53        | (0-0.028) ng/mL        |
| Ferritin              | 3 (50%), N=6/26                    | (13-150) ng/mL         | Ferritin            | 17 (35.4%), N=48/53               | (21.8-274.66) ng/mL    |

COVID-19, coronavirus disease 2019; CK-MB, creatine kinase isoenzyme-MB; Pro-BNP, pro-type B natriuretic peptide; cTnT, cardiac troponin T; cTnI, cardiac troponin I; ICU, intensive care unit; SD, standard deviation; IQR, interquartile range.
